# Supplementary material
Source: PubMed Central journal article supplement (PMC3299901)
Supplement: NIHMS341815-supplement-4.pdf [file NIHMS341815-supplement-4.pdf]

525 **Supplementary Figure Legends**

526

527 **Supplementary Figure 1. Example magnified views of automated and manual**  
528 **segmentations.** This magnified view demonstrates that the manual segmentations (performed at  
529 lower magnification) oversimplify cell borders, which explains why the automated  
530 segmentations consistently have higher perimeters.

531

532 **Supplementary Figure 2. Quantitative comparison of automated and manual myocyte**  
533 **segmentation for area, perimeter, elongation and circularity.** Automated and manual  
534 segmentation for 100 myocytes from a combination control, isoproterenol, and serum-treated  
535 conditions were compared. A) Absolute percent error in each phenotypic metric compared with  
536 manual segmentation. B) Percent error in in each phenotypic metric compared with manual  
537 segmentation. Error bars are +/- SE.

538

539 **Supplementary Figure 3. Representative images of myocytes treated with hypertrophic**  
540 **agonists.** Below each cell are the values of the phenotypic metrics (area, perimeter, circularity  
541 and elongation) for that particular cell, which overall agree well with the median for that  
542 condition.

543

544 **Supplementary Figure 4. Comparison of manual scoring of sarcomeric organization with**  
545 **automated measures of image texture.** Two researchers manually scored for the overall level  
546 of sarcomeric organization in each cell (100 myocytes) on a 1-4 scale, and the average result was  
547 taken. Manual scores are compared with 3 automated measures of image texture within in each  
548 cell: Uniformity, Contrast, and Correlation.

549

550 **Supplementary Figure 5. Representative images of sarcomeric organization from myocytes**  
551 **treated with hypertrophic agonists.** Above each cell is listed the quantitative value of  
552 sarcomeric organization (1-Uniformity) for that cell. Representative cells were chosen by  
553 identifying cells close to the median of that population.
